# Supplementary material for: Network analysis of differential Ras isoform mutation effects on intestinal epithelial responses to TNF-α
Source: Royal Society of Chemistry journal article supplement (doi:10.1039/c3ib40062j), 2013-01-01
Supplement: c3ib40062j.xlsx [file c3ib40062j.xlsx]

## Sheet: Table S1
Table S1. 2-way ANOVA tests on signaling curves
	pStat3 (Ser727)			pRsk1 (Thr359/Ser363)			pp38 (Thr180/Tyr182)			pGsk3α/β (Ser21/Ser9)			pErk1/2 (T202/Y204,T185/TY187)			pMek1 (Ser217/Ser221)			pIκBα (Ser32/Ser36)			pCreb (Ser133)			pc-Jun (Ser63)			pS6RP (Ser235/Ser236)			pAtf2(Thr71)			pJnk (Thr183/Tyr185)			pAkt (Ser473)			pStat3(Tyr705)
	F-value	P-value		F-value	P-value		F-value	P-value		F-value	P-value		F-value	P-value		F-value	P-value		F-value	P-value		F-value	P-value		F-value	P-value		F-value	P-value		F-value	P-value		F-value	P-value		F-value	P-value		F-value	P-value
Villin-Cre/+ vs. Villin-Cre/+; NrasLSL/+	1.999	0.1728		0.3573	0.5567		2.381	0.1385		1.17	0.2922		0.7677	0.3913		10.5	0.0041		2.622	0.121		0.3695	0.5501		0.05415	0.8184		1.247	0.2773		1.075	0.3121		13.41	0.0015		5.624	0.0279		0.01559	0.9019
Villin-Cre/+ vs. Villin-Cre/+; Nras2lox/2lox	0.9226	0.3483		12.19	0.0023		0.6437	0.4318		1.491	0.2362		0.5437	0.4695		8.1	0.01		4.111	0.0561		2.31	0.1442		0.5519	0.4662		2.678	0.1174		0.1008	0.7542		0.02783	0.8692		7.792	0.0113		0.1616	0.692
Villin-Cre/+ vs. Villin-Cre/+; KrasLSL/+	6.205	0.0216		2.356	0.1405		1.408	0.2494		4.042	0.0581		0.947	0.3421		51.48	< 0.0001		11.83	0.0026		15.39	0.0008		15.99	0.0007		64.58	< 0.0001		34.35	< 0.0001		1.602	0.2202		15	0.0009		0.03488	0.8537
Villin-Cre/+; Nras2lox/2lox vs. Villin-Cre/+; KrasLSL/+	0.3382	0.5673		5.995	0.0064		5.759	0.0263		5.174	0.0341		8.858e-05	0.9926		21.64	0.0002		0.04551	0.8332		5.533	0.029		5.964	0.024		11.64	0.0028		9.518	0.0058		1.242	0.2784		22.22	0.0001		0.3419	0.5653
Villin-Cre/+; NrasLSL/+ vs. Villin-Cre/+; Nras2lox/2lox	0.07343	0.7892		16.45	0.0006		9.395	0.0061		0.008848	0.926		0.09106	0.766		2.477	0.1312		0.5388	0.4715		0.9395	0.344		0.4794	0.4967		0.3546	0.5582		0.7276	0.4038		12.18	0.0023		15.6	0.0008		0.2955	0.5927
Villin-Cre/+; NrasLSL/+ vs. Villin-Cre/+; KrasLSL/+	0.07971	0.7806		4.231	0.053		0.08985	0.7675		3.881	0.0628		0.1089	0.7448		40.49	< 0.0001		0.6768	0.4204		12.29	0.0022		38.48	< 0.0001		23.56	< 0.0001		20.37	0.0002		3.563	0.0737		2.317	0.1436		0.004669	0.9462
WT vs. Rag1																13.26	0.0016
Villin-Cre/+; NrasLSL/+ vs. Rag1																8.88	0.0074
Villin-Cre/+; KrasLSL/+ vs. Rag1																15.83	0.0007
Villin-Cre/+; Nras2lox/2lox vs. Rag1																0.9631	0.3381
WT (anti-MCP1) vs. WT (IgG)																16.96	0.0005

## Sheet: Table S2
Figure S2. 2-way ANOVA tests on cell death and proliferation curves
	Cell Death (Cleaved Caspase 3)			Duodenum Proliferation (pHistoneH3+ Count)				Ileum Proliferation (pHistoneH3+ Count)
	F-value	P-value		F-value	P-value			F-value	P-value
Villin-Cre/+ vs. Villin-Cre/+; NrasLSL/+	0.01268	0.9114		1.796	0.1824			0.921	0.3389
Villin-Cre/+ vs. Villin-Cre/+; Nras2lox/2lox	6.278	0.0191		0.4269	0.5145			3.297	0.9002
Villin-Cre/+ vs. Villin-Cre/+; KrasLSL/+	2.296	0.1453		2.4	0.0717			4.378	0.0384
Villin-Cre/+; Nras2lox/2lox vs. Villin-Cre/+; KrasLSL/+	14.88	0.0007		1.721	0.1923			0.04684	0.8292
Villin-Cre/+; NrasLSL/+ vs. Villin-Cre/+; Nras2lox/2lox	8.104	0.0085		0.8801	0.3502			0.5268	0.4696
Villin-Cre/+; NrasLSL/+ vs. Villin-Cre/+; KrasLSL/+	4.254	0.0518		0.00682	0.9344			0.935	0.3361

## Sheet: Table S3
Table S3. Bonferroni Post Test t-values.
Cell Death (Cleaved Caspase 3)
	0 h	0.5 h	1 h	2 h	4 h
Villin-Cre/+ vs. Villin-Cre/+; NrasLSL/+	0.1584	0.3192	0.2352	0.769	0.609
Villin-Cre/+ vs. Villin-Cre/+; Nras2lox/2lox	0.1409	0.3952	1.598	2.531	0.938
Villin-Cre/+ vs. Villin-Cre/+; KrasLSL/+	0.7055	0.1853	0.5812	1.492	0.4243
Villin-Cre/+; Nras2lox/2lox vs. Villin-Cre/+; KrasLSL/+	0.6538	0.5705	2.189	3.869	1.343
Villin-Cre/+; NrasLSL/+ vs. Villin-Cre/+; Nras2lox/2lox	0.2722	0.2005	1.725	3.588	0.6639
Villin-Cre/+; NrasLSL/+ vs. Villin-Cre/+; KrasLSL/+	0.7949	0.7719	0.4007	1.156	1.621
Duodenum Proliferation (pHistoneH3+ Count)
	0 h	0.5 h	1 h	2 h	4 h
Villin-Cre/+ vs. Villin-Cre/+; NrasLSL/+	0	2.115	0.556	0.007396	0.3665
Villin-Cre/+ vs. Villin-Cre/+; Nras2lox/2lox	0	2.363	0.06525	0.5028	0.09337
Villin-Cre/+ vs. Villin-Cre/+; KrasLSL/+	0	3.017	0.2319	0.2334	0.1225
Villin-Cre/+; Nras2lox/2lox vs. Villin-Cre/+; KrasLSL/+	0	1.745	0.4429	0.3434	0.2732
Villin-Cre/+; NrasLSL/+ vs. Villin-Cre/+; Nras2lox/2lox	0	0.2989	0.7875	0.512	0.4913
Villin-Cre/+; NrasLSL/+ vs. Villin-Cre/+; KrasLSL/+	0	1.009	0.4448	0.2357	0.2845
Ileum Proliferation (pHistoneH3+ Count)
	0 h	0.5 h	1 h	2 h	4 h
Villin-Cre/+ vs. Villin-Cre/+; NrasLSL/+	0	0.3019	0.3672	0.5013	1.039
Villin-Cre/+ vs. Villin-Cre/+; Nras2lox/2lox	0	1.301	0.6787	0.9103	1.375
Villin-Cre/+ vs. Villin-Cre/+; KrasLSL/+	0	0.1945	1.475	0.8258	1.968
Villin-Cre/+; Nras2lox/2lox vs. Villin-Cre/+; KrasLSL/+	0	0.9548	0.8568	0.06856	0.549
Villin-Cre/+; NrasLSL/+ vs. Villin-Cre/+; Nras2lox/2lox	0	0.7998	0.2711	0.3156	0.3301
Villin-Cre/+; NrasLSL/+ vs. Villin-Cre/+; KrasLSL/+	0	0.08992	1.045	0.259	0.8707
